# Supplementary material
Source: MDPI journal article supplement (https://www.mdpi.com/2073-4352/9/11/571)
Supplement: s1 [file s1]

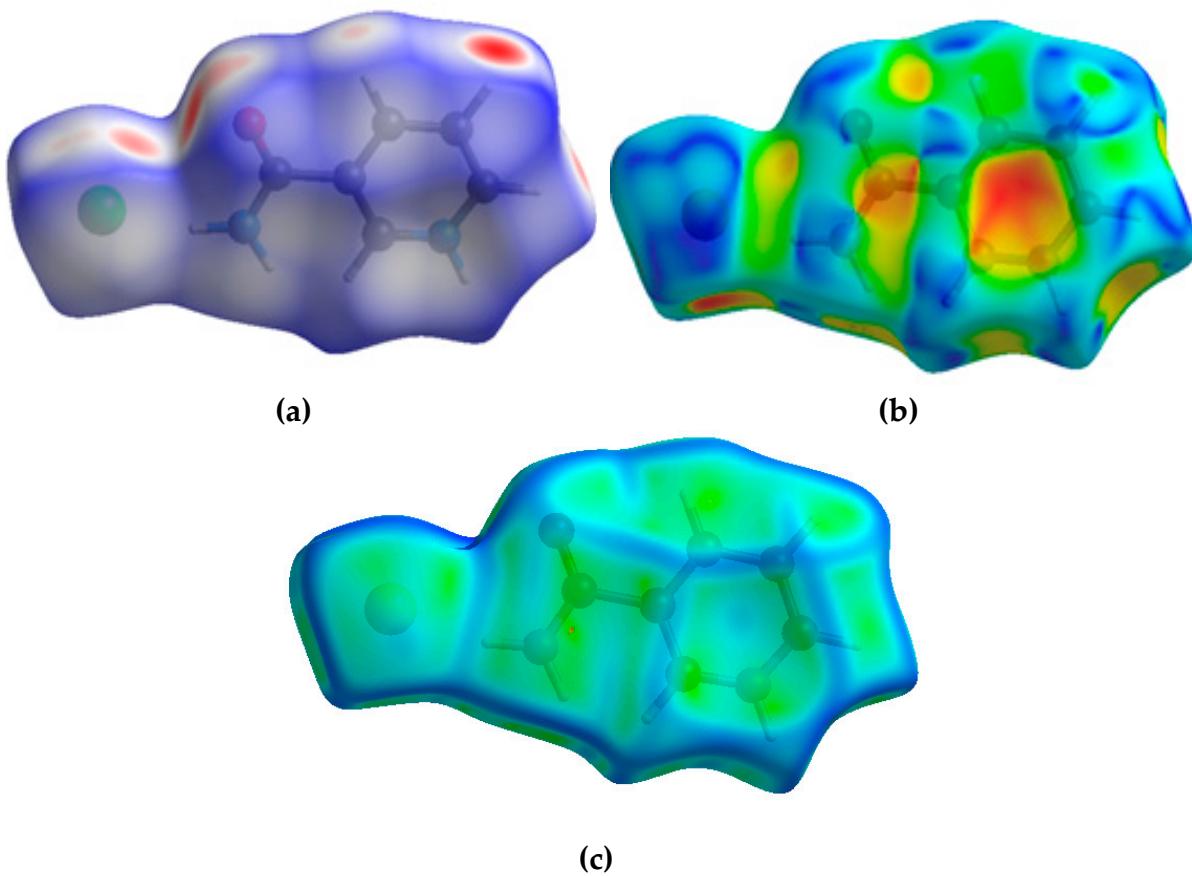

**Figure S1.** View of the three-dimensional Hirshfeld surface of the new polymorph plotted over (a)  $d_{\text{norm}}$ , (b) shape-index and (c) curvedness.

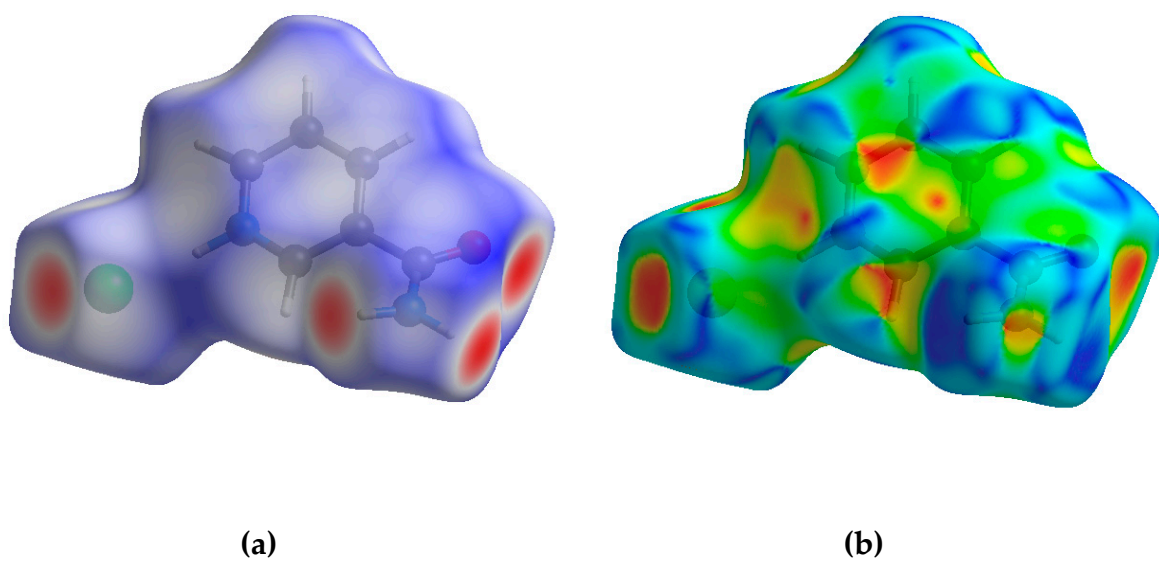

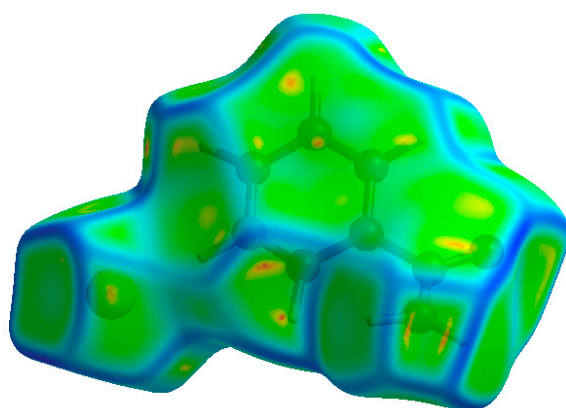

(c)

Figure S2. View of the three-dimensional Hirshfeld surface of the previous polymorph [19] plotted over (a)  $d_{\text{norm}}$ , (b) shape-index and (c) curvedness.

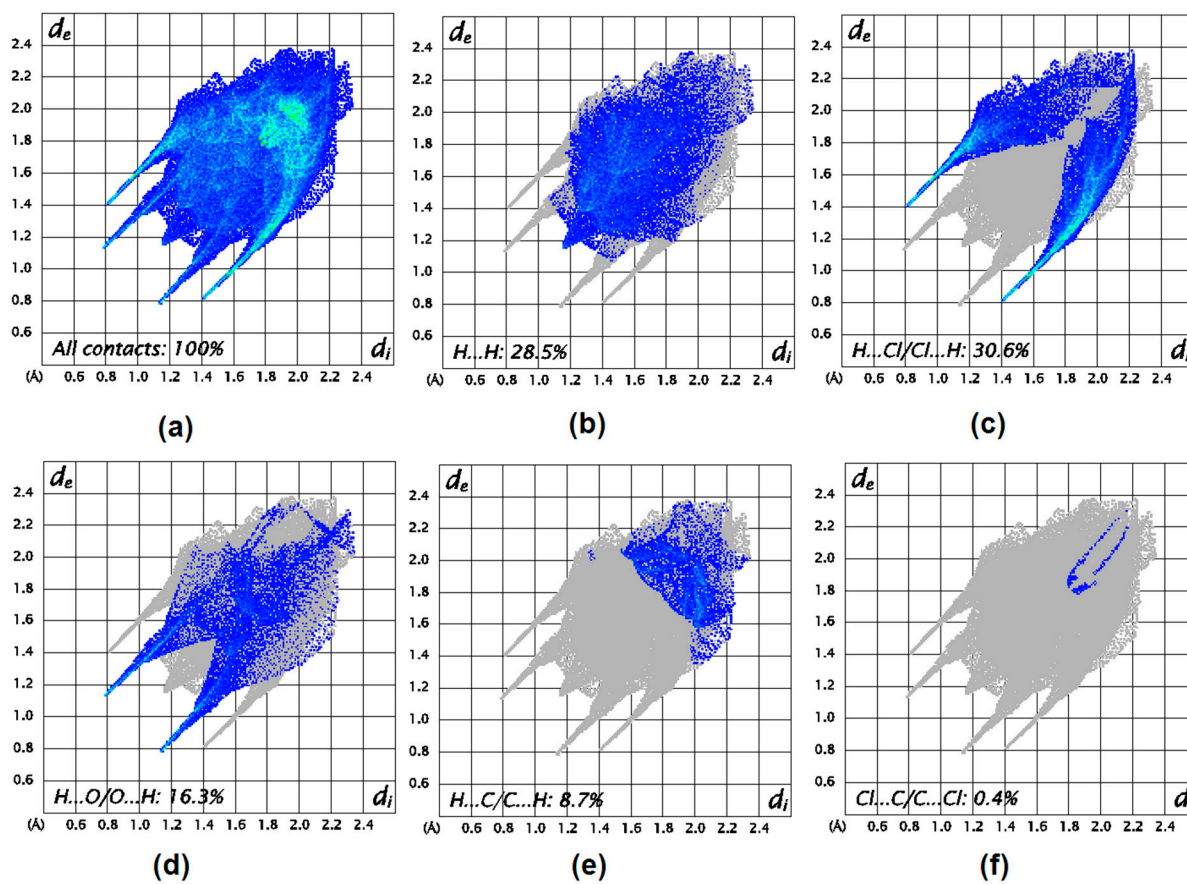

**Figure S3.** The full two-dimensional fingerprint plots of the previous polymorph [19], showing (a) all interactions, and delineated into (b) H...H, (c) H...Cl/Cl...H, (d) H...O/O...H, (e) H...C/C...H and (f) Cl...C/C...Cl. The  $d_i$  and  $d_e$  values are the closest internal and external distances (in Å) from given points on the Hirshfeld surface.
